# Supplementary material for: Functional differences and similarities in activated peripheral blood mononuclear cells by lipopolysaccharide or phytohemagglutinin stimulation between human and cynomolgus monkeys
Source: PubMed Central journal article supplement — Ann Transl Med. 2021 Feb;9(3):257. doi: 10.21037/atm-20-4548 (PMC7940909; doi:10.21037/atm-20-4548), 2021-02
Supplement: atm-09-03-257-dss.pdf [file atm-09-03-257-dss.pdf]

## Data Sharing Statement

|                     |                                                                                                                                                    |                                                                                                                                                                                                                                                                                                                              |
|---------------------|----------------------------------------------------------------------------------------------------------------------------------------------------|------------------------------------------------------------------------------------------------------------------------------------------------------------------------------------------------------------------------------------------------------------------------------------------------------------------------------|
| <b>Article Info</b> | <a href="http://dx.doi.org/10.21037/atm-20-4548">http://dx.doi.org/10.21037/atm-20-4548</a>                                                        |                                                                                                                                                                                                                                                                                                                              |
| <b>Item</b>         | <b>Question</b>                                                                                                                                    | <b>Authors' Response<br/>(place "-" if not applicable)</b>                                                                                                                                                                                                                                                                   |
| 1                   | Would you like to share data collected for your study to others?                                                                                   | Yes                                                                                                                                                                                                                                                                                                                          |
| 2                   | If not, would you like to share the reason for your decision?                                                                                      | -                                                                                                                                                                                                                                                                                                                            |
| 3                   | What data in particular will be shared?                                                                                                            | The gene expression profile data in particular will be shared, and we found some different mechanism between human and monkey with PHA/LPS stimulation, which has seldom been provided in previous studies. For the Reader, the raw microarray data have been deposited in the GEO database under accession number GSE90723. |
| 4                   | Any other documents will be share? Such as study protocol, statistical analysis plan, informed consent form, clinical study report, analytic code. | Study protocol, statistical analysis plan, informed consent form will also be shared if requested.                                                                                                                                                                                                                           |
| 5                   | When will data availability begin?                                                                                                                 | From the publication date.                                                                                                                                                                                                                                                                                                   |
| 6                   | When will data availability end?                                                                                                                   | Five years with the publication date, since the technique may be updated over time.                                                                                                                                                                                                                                          |
| 7                   | To whom will you share the data?                                                                                                                   | Toxicologist and R&D personnel in the pharmaceutical industry who are interested in immunotoxicology.                                                                                                                                                                                                                        |
| 8                   | For what type of analysis or purpose?                                                                                                              | For preclinical safety evaluation of drugs and risk assessment in animal studies                                                                                                                                                                                                                                             |
| 9                   | How or where can the data/documents be obtained?                                                                                                   | Emails could be sent to the address below to obtain the shared data:<br>linzhi@nifdc.org.cn                                                                                                                                                                                                                                  |
| 10                  | Any other restrictions?                                                                                                                            | We may balance the potential benefits and risks for each request and then provide the data that could be shared.                                                                                                                                                                                                             |
