# Supplementary material for: Functional differences and similarities in activated peripheral blood mononuclear cells by lipopolysaccharide or phytohemagglutinin stimulation between human and cynomolgus monkeys
Source: PubMed Central journal article supplement — Ann Transl Med. 2021 Feb;9(3):257. doi: 10.21037/atm-20-4548 (PMC7940909; doi:10.21037/atm-20-4548), 2021-02
Supplement: atm-09-03-257-supplementary.pdf [file atm-09-03-257-supplementary.pdf]

**Table 1** Pathway in human and monkey PBMCs after treatment with 10 µg PHA/ml by KEGG pathway analysis of DEGs

|                                           | Pathway name                  | P-value for enrichment | Count (DEGs)          |
|-------------------------------------------|-------------------------------|------------------------|-----------------------|
| Human                                     | *DNA replication              | $1.11 \times 10^{-16}$ | 18                    |
|                                           | *Cell cycle                   | $1.44 \times 10^{-15}$ | 27                    |
|                                           | Mismatch repair               | $6.34 \times 10^{-10}$ | 10                    |
|                                           | Pyrimidine metabolism         | $3.80 \times 10^{-7}$  | 15                    |
|                                           | Oocyte meiosis                | $2.43 \times 10^{-6}$  | 15                    |
|                                           | p53 signaling pathway         | $8.72 \times 10^{-6}$  | 11                    |
|                                           | Nucleotide excision repair    | $5.77 \times 10^{-5}$  | 8                     |
|                                           | *Systemic lupus erythematosus | 0.001320315            | 12                    |
|                                           | One carbon pool by folate     | 0.002098523            | 4                     |
|                                           | Monkey                        | *Cell cycle            | $1.39 \times 10^{-7}$ |
| *DNA replication                          |                               | $7.57 \times 10^{-7}$  | 6                     |
| *Systemic lupus erythematosus             |                               | 0.000252866            | 7                     |
| Malaria                                   |                               | 0.000789218            | 4                     |
| Staphylococcus aureus infection           |                               | 0.000855251            | 4                     |
| Lysosome                                  |                               | 0.003184947            | 5                     |
| Chemokine signaling pathway               |                               | 0.006346366            | 6                     |
| Other glycan degradation                  |                               | 0.007767431            | 2                     |
| Chagas disease (American trypanosomiasis) |                               | 0.011799898            | 4                     |
| NOD-like receptor signaling pathway       |                               | 0.012418785            | 3                     |

\*Same pathway found in both human and monkey groups.

**Table 2** Pathway in human and monkey PBMCs after treatment with 10 µg LPS/ml by KEGG pathway analysis of DEGs

|        | Pathway name                              | P-value for enrichment  | Count (DEGs) |
|--------|-------------------------------------------|-------------------------|--------------|
| Human  | Cytokine-cytokine receptor interaction    | $3.74 \times 10^{-9}$   | 18           |
|        | Chagas disease (American trypanosomiasis) | $6.84 \times 10^{-7}$   | 10           |
|        | Chemokine signaling pathway               | $4.27 \times 10^{-6}$   | 12           |
|        | NOD-like receptor signaling pathway       | 0.000130695             | 6            |
|        | Amoebiasis                                | 0.000393937             | 7            |
|        | Malaria                                   | 0.000462262             | 5            |
|        | Osteoclast differentiation                | 0.001219195             | 7            |
|        | Toll-like receptor signaling pathway      | 0.001905942             | 6            |
|        | *Graft-versus-host disease                | 0.002155832             | 4            |
|        | Leishmaniasis                             | 0.002372092             | 5            |
| Monkey | Type I diabetes mellitus                  | $-2.22 \times 10^{-16}$ | 16           |
|        | Allograft rejection                       | $2.22 \times 10^{-16}$  | 15           |
|        | Antigen processing and presentation       | $2.22 \times 10^{-16}$  | 19           |
|        | *Graft-versus-host disease                | $4.44 \times 10^{-16}$  | 16           |
|        | Autoimmune thyroid disease                | $1.34 \times 10^{-14}$  | 15           |
|        | Viral myocarditis                         | $2.02 \times 10^{-14}$  | 17           |
|        | Phagosome                                 | $1.30 \times 10^{-11}$  | 19           |
|        | Cell adhesion molecules (CAMs)            | $2.97 \times 10^{-10}$  | 16           |
|        | Staphylococcus aureus infection           | $3.73 \times 10^{-9}$   | 10           |
|        | Rheumatoid arthritis                      | $2.02 \times 10^{-7}$   | 11           |

\*Same pathway found in both human and monkey groups.
